# Supplementary material
Source: PubMed Central journal article supplement (PMC9617003)
Supplement: 11357_2022_529_MOESM1_ESM.pdf [file 11357_2022_529_MOESM1_ESM.pdf]

### Supplemental Figure 1.

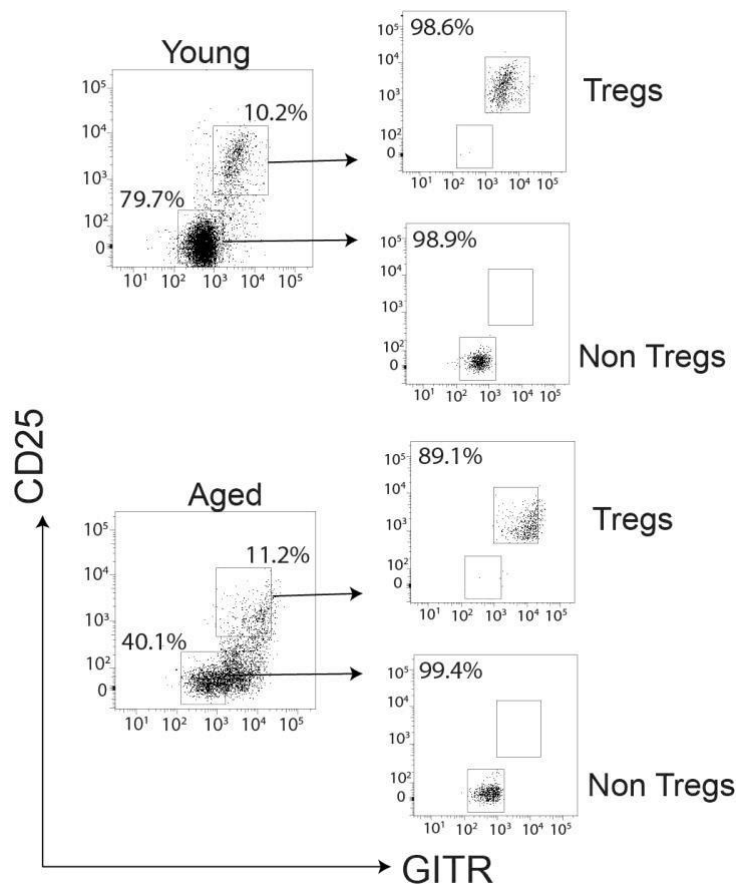

**Supplementary Figure 1.** Representative dot plots showing T regulatory cell sorting strategy. Single cell suspensions of a mixture of draining cervical lymph nodes (CLN) and spleen of young (2-3 months) and aged mice (22-24 months) (n=5-7 biological replicates/group; each replicate include the CLN and spleens from three mice) were obtained and fluorescently labelled with the corresponding antibodies. The following gating strategy was used: cells were identified by forward scatter area versus side scatter area; doublets were discriminated by forward scatter height versus forward scatter area (Singlets 1) followed by side scatter height versus side scatter area (Singlets 2); thereafter dead cells were excluded with DAPI and CD4<sup>+</sup> cells were gated and then either T regulatory (Tregs, CD4<sup>+</sup>CD25<sup>+</sup>GITR<sup>+</sup>) and non-Tregs, CD4<sup>+</sup>CD25<sup>neg</sup>GITR<sup>neg</sup>) were selected for sorting. Frequency of cells is shown as percentage of CD4<sup>+</sup> cells. The numbers above the squares indicate the purity of the sorted population before and after the cell sorting (Left or right panels, respectively). Neg = negative.

**Supplemental Figure 2.**

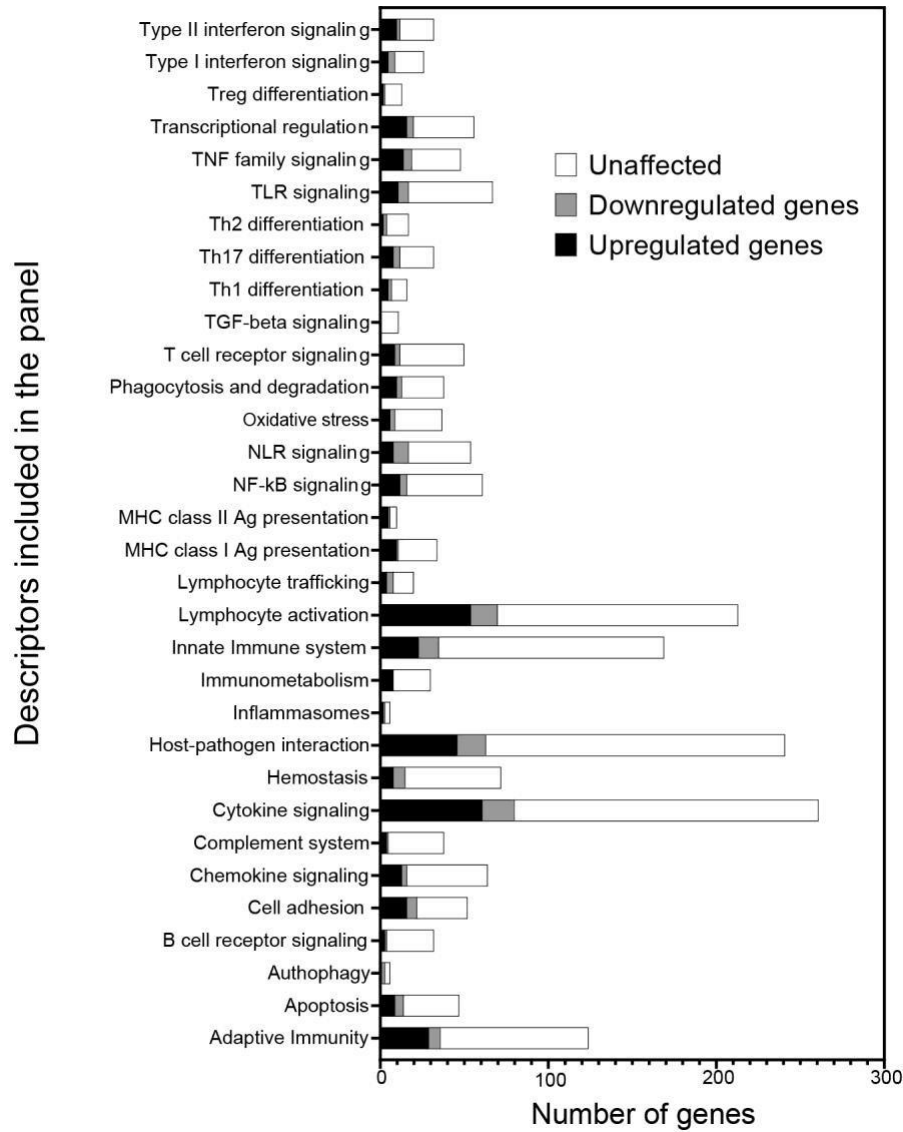

**Supplemental Figure 2. Number of immunity-related genes modified in the mice lymphoid tissues by aging.** Tregs from a mixture of mice CLN and spleen from either young or aged mice were sorted and then subjected to NanoString® analysis. The bars indicated the number of genes either up, down regulated or unmodified in the aged tissues from those included in the panel, as compared with young tissues.
